# Supplementary material for: Modeling small cell lung cancer (SCLC) biology through deterministic and stochastic mathematical models
Source: PubMed Central journal article supplement (PMC5995226; doi:10.18632/oncotarget.25360), 2018-05-25
Supplement: oncotarget-09-26226-s001.pdf [file oncotarget-09-26226-s001.pdf]

# Modeling small cell lung cancer (SCLC) biology through deterministic and stochastic mathematical models

## SUPPLEMENTARY MATERIALS

**Supplementary Video 1: Most common metastasis sites of SCLC.** Simulation of early time points and the endpoint (from top left to bottom right) of tumor cells (purple) metastasizing to different organs (colored as indicated). See [Supplementary\\_Video\\_1](#)

**Supplementary Video 2: The cellular automaton model of SCLC growth and necrosis.** Growth of tumor (scale on left side) and oxygen levels within the tumor (color scale on right side) at different time points. See [Supplementary\\_Video\\_2](#)

**Supplementary Video 3: The cellular automaton model of SCLC growth and necrosis.** Growth of tumor showing the extent of the necrosis at different times (red = live cells, green = apoptotic cells, and blue = necrotic cells). The necrosis of the tumor initiates at > 180 hours. See [Supplementary\\_Video\\_3](#)

**Supplementary Video 4: Simulation of tumor heterogeneity and tumor burden in SCLC.** Tumor heterogeneity and cellular automata at different time points. Tumor burden at corresponding time points, indicating the growth of wild-type cells (red) and cells containing mutations (blue). See [Supplementary\\_Video\\_4](#)
